# Supplementary material for: Critical re-examination of known purported fossil Bombycoidea (Lepidoptera)
Source: PeerJ. 2023 Nov 10;11:e16049. doi: 10.7717/peerj.16049 (PMC10642363; doi:10.7717/peerj.16049)
Supplement: Supplemental Information 1 [file peerj-11-16049-s001.xlsx]

## Sheet: Sheet1
	Specimen	Repository and identifier	Excavation data	Age	Reliability of identification
1.	Mioclanis shanwangiana Zhang, Sun and Zhang, 1994	PFDL: SK000361	China: Shandong, Linqu, Shanwang (Shanwang Formation)	Langhian, Middle Miocene	Assigned to Sphingidae with reasonable certainty
2.	Fossilized sphingid larva in Zeuner (1927)	GPIT: GPIT/HE/00071, NC/25/K/15.	Germany: Baden–Württemberg, Münsingen, Böttingen b. Münsingen (“Böttinger Marble”)	Sarmatian, Late Middle Miocene	Assigned to Sphingidae with reasonable certainty
3.	Proboscis of sphingid moth in Churcher (1966)	ROMUT: ROMIP30729	Peru: Piura, Talara (Lobitos Tablazo Fm.)	Late Pleistocene	Assigned to Sphingidae with reasonable certainty
4.	Fossil larva in Leakey (1952) and Kitching & Sadler (2011)	NMK: KNMI-MW 261	Kenya: South Nyanza, Rusinga and M’fwangano Islands in Lake Victoria (Hiwegi Fm.)	Burdigalian, Early Miocene	Assigned to Sphingidae with reasonable certainty
5.	Fossilized pupa in Kitching & Sadler (2011)	NMT: EP 352/03	Tanzania: Laetoli, Upper Laetoli Beds (Laetoli Formation.)	?Gelasian, Late Pliocene	Assigned to Saturniidae with reasonable certainty
6.	Trace fossils of alleged sphingid or saturniid pupation chambers in the ichnogenus Teisseirei Roselli, 1939	different repositories, see main text	different sites, see main text	different ages, see main text	Erroneously assigned to the Bombycoidea
7.	Fossilized ovoid structures reported by Kuntz (2010)	unknown	France: Alsace, North Middle Upper Rhine Graben, Bouxwiller quarry (Bouxwiller Formation)	Lutetian, Middle Eocene	Erroneously assigned to the Bombycoidea
8.	Attacus? fossilis Cockerell, 1914	UCM: UCM-8554	USA: Colorado, Teller County, Florissant Beds National Monument, Florissant Formation	Late Priabonian, Late Eocene (33.9±0.1 Ma)	Erroneously assigned to the Bombycoidea
9.	Compression-impression fossil of adult moth in Zhang (1989)	SFML: 820157	China: Shandong, Linqu, Shanwang (Shanwang Formation)	Langhian, Middle Miocene	Erroneously assigned to the Bombycoidea
10.	Sphingidites weidneri Kernbach, 1967	GZG: GZG.W.03445	Germany: Lower Saxony, Willershausen am Harz	Piacen­zian, Late Pliocene	Erroneously assigned to the Bombycoidea
11.	Bombycites oeningensis Heer, 1849	unknown	Germany, Baden-Württemberg: Oeningen (“Molasseformation”), that is Wangen (near Öhningen – see e.g., Cockerell 1915)	Messinian, Late Miocene	Erroneously assigned to the Bombycoidea
12.	Bombycites buechii Heer, 1865	ETH: Specimen barcode number: 0000000005466	Germany, Baden-Württemberg: Oeningen (“Molasseformation”) (i.e., Wangen)	Messinian, Late Miocene	Erroneously assigned to the Bombycoidea
13.	Compression-impression fossil of wing scale in by George (1952)	SJCA: slide no. 16	Pakistan: Punjab, Salt Range, Warcha and Jankush Nulla Gorges (Saline Series dolomite)	Late Eocene	Erroneously assigned to the Bombycoidea
14.	Fossilized scales and cuticular fragments in Richter & Storch (1980)	unknown	Germany: Hesse, S Frankfurt, near Darmstadt, Messel oil shale-layers (Messel Formation)	Early Lutetian, Middle Eocene	Erroneously assigned to the Bombycoidea
15.	Non-lepidopteran fossil insect erroneously assigned to Saturniidae by Grande (2013)	USNM: USNM PAL 618360	USA: Wyoming, Lincoln County, Green River Formation, Fossil Butte Member, locality F	53–51 Ma	Erroneously assigned to the Bombycoidea
16.	Myrmicium schroeteri (Germar, 1839) [Sphinx schroeteri Germar, 1839	MfN: MB.I.0860	Germany: Solnhofen limestone deposits in Bavaria.	Tithonian, Upper Jurassic	Erroneously assigned to the Bombycoidea
16.	Sphinx snelleni Weyenbergh, 1869]	TMH: 15396 and 15397	Germany: Solnhofen limestone deposits in Bavaria.	Tithonian, Upper Jurassic	Erroneously assigned to the Bombycoidea
16.	Sphinx larva illustrated by Weyenbergh (1869)	TMH: 15403	Germany: Solnhofen limestone deposits in Bavaria.	Tithonian, Upper Jurassic	Erroneously assigned to the Bombycoidea
17.	Fossilized flower petal of Nymphaea tentatively interpreted as a sphingid larva by Nel & Nel (1985)	MNHN: n°215 A	France: Les Figons, Aix-en-Provence	Rupelian, Oligocene	Erroneously assigned to the Bombycoidea
